# Supplementary material
Source: PubMed Central journal article supplement (PMC9342626)

Supplemental Figure S1

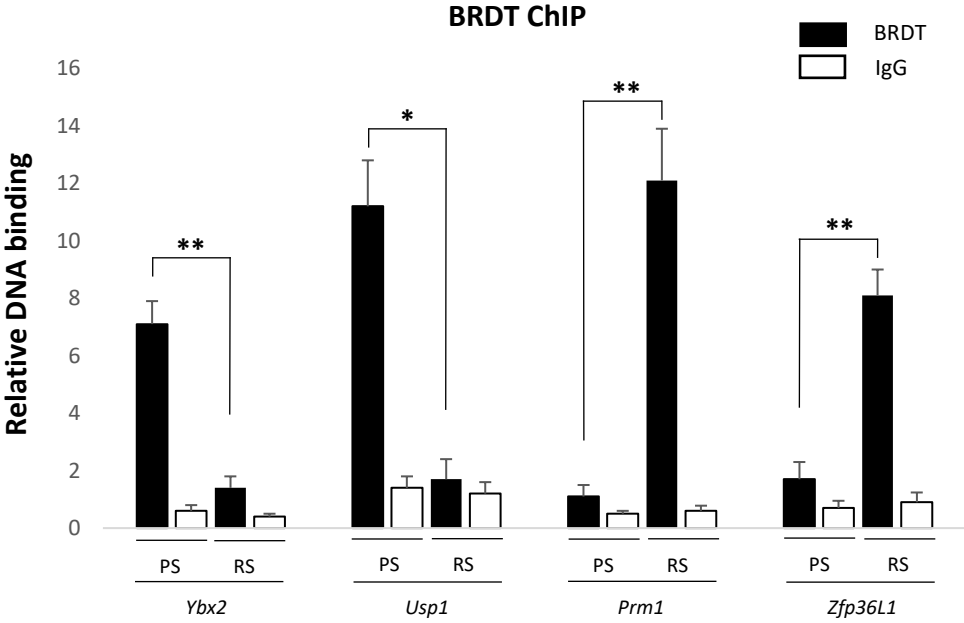

Supplement: NIHMS1658364-supplement-FIG_S1.pdf [file NIHMS1658364-supplement-FIG_S1.pdf]
